# Supplementary material for: Tracking Japan’s development assistance for health, 2012–2016
Source: Springer Nature journal article supplement (doi:10.1186/s12992-020-00559-2), 2020-04-15
Supplement: MOESM1 [file 17898664]

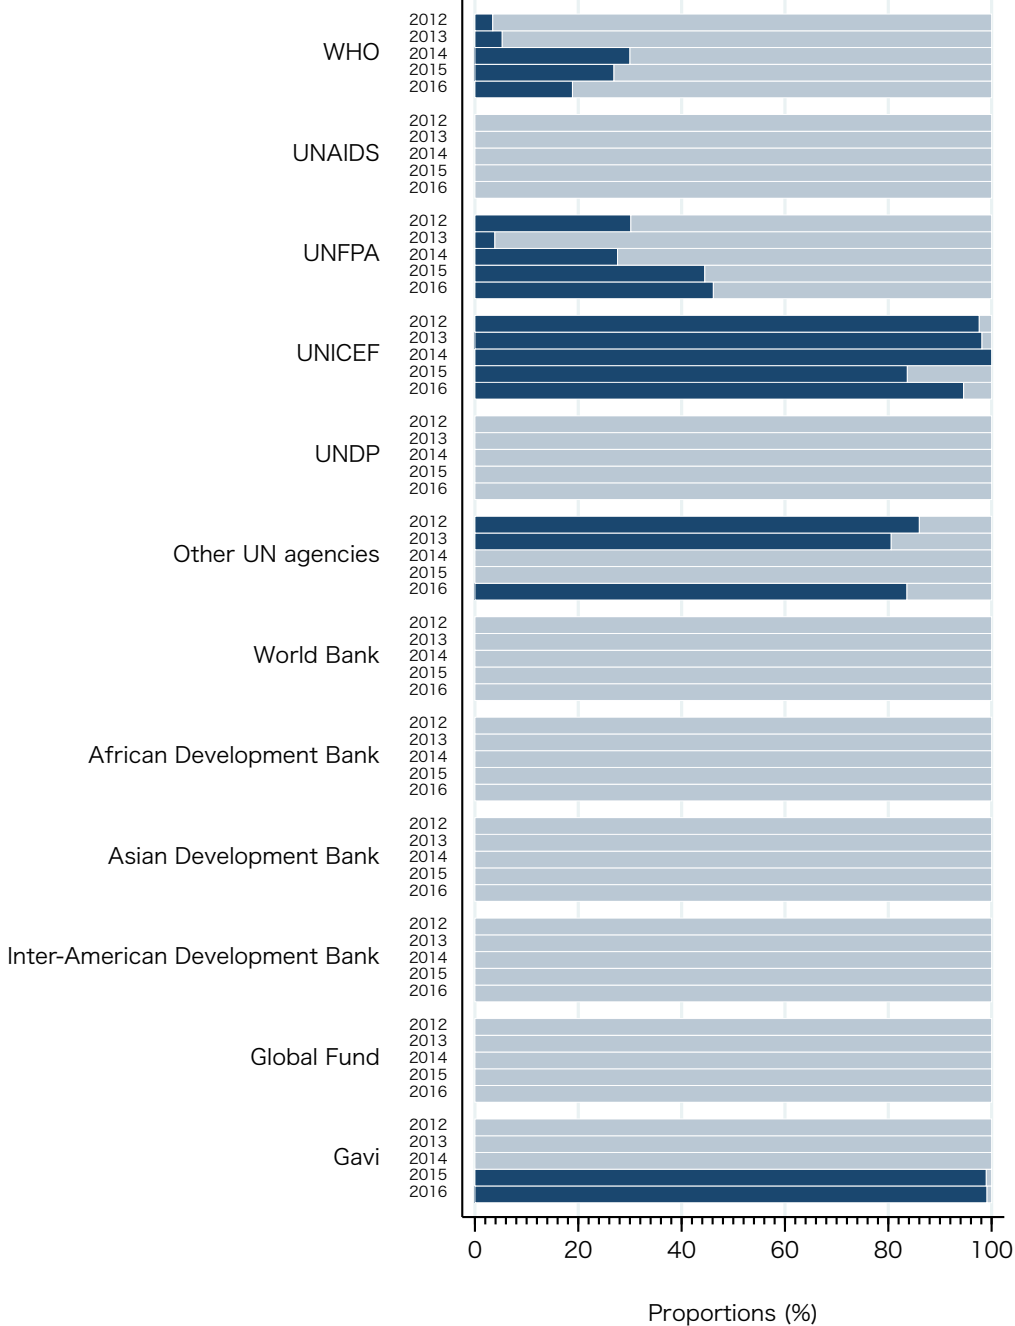

Core funding  
 Earmarked funding/bi-multi
